# Supplementary material
Source: PubMed Central journal article supplement (PMC1995631)
Supplement: jphysiol_2006.115246_3.pdf [file jphysiol_2006.115246_3.pdf]

## SUPPLEMENTAL FIGURE LEGENDS

Supplemental Figure 1. The relationship between the expression level and channel desensitization. Oocytes showing various levels of P2X<sub>2</sub> expression were prepared. Data were recorded as in Fig. 2, and the extent of desensitization was plotted against the peak current amplitude. The dashed line indicates the linear regression line of the data (n=29).

Supplemental Figure 2. Electrophysiological measurement of the Gq-coupled receptor response. *A*, Current traces recorded from an oocyte expressing WT P2X<sub>2</sub> and M1 receptors after application of 100 μM ACh. Oocytes were held at -80mV and depolarizing step pulses to 30 mV were applied every 1s. *B*, Typical example of the time course of the response to the application of 100 μM ACh. The current amplitudes at the end of the step pulses to 30 mV shown by an arrow in *A* were plotted. The bath solution was a Na<sup>+</sup>-based external solution with no Ca<sup>2+</sup>.
