# Supplementary material
Source: PubMed Central journal article supplement (PMC1995631)

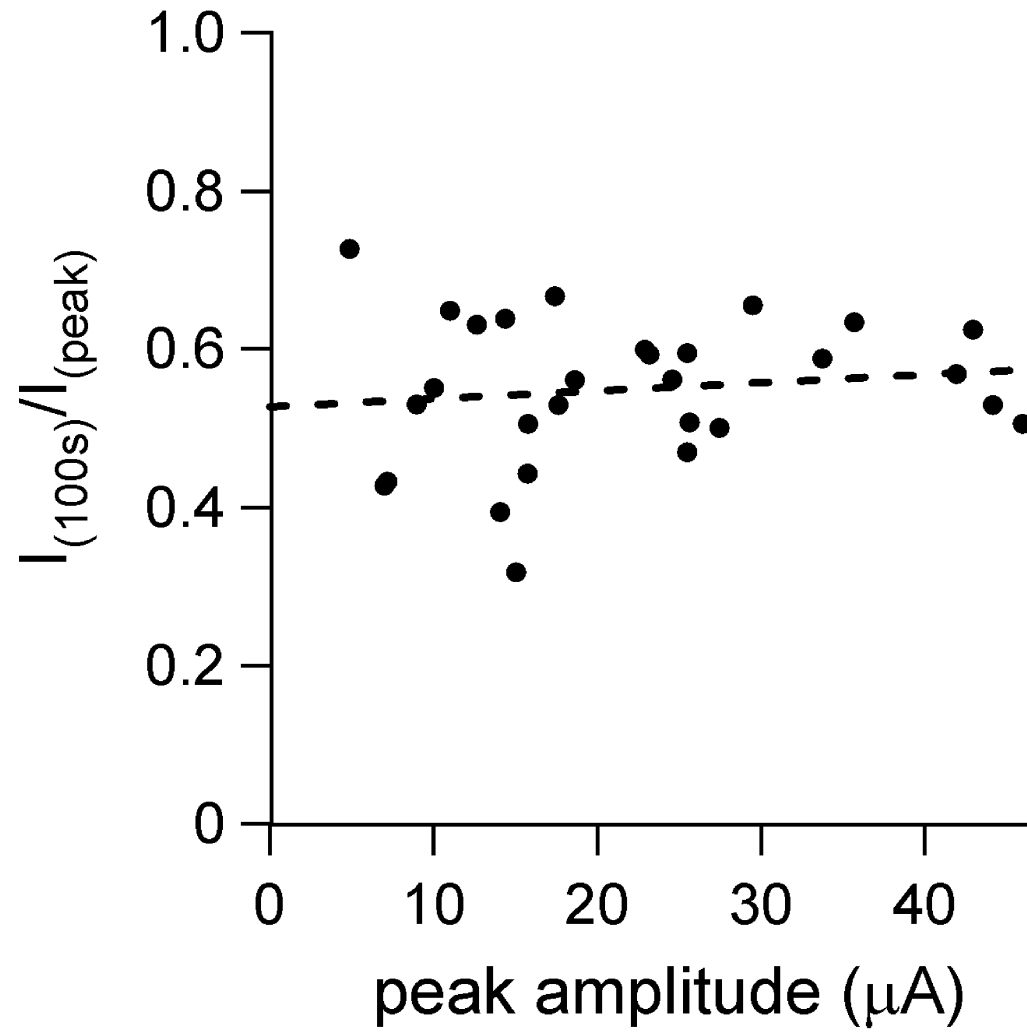

Supplement: jphysiol_2006.115246_1.pdf [file jphysiol_2006.115246_1.pdf]

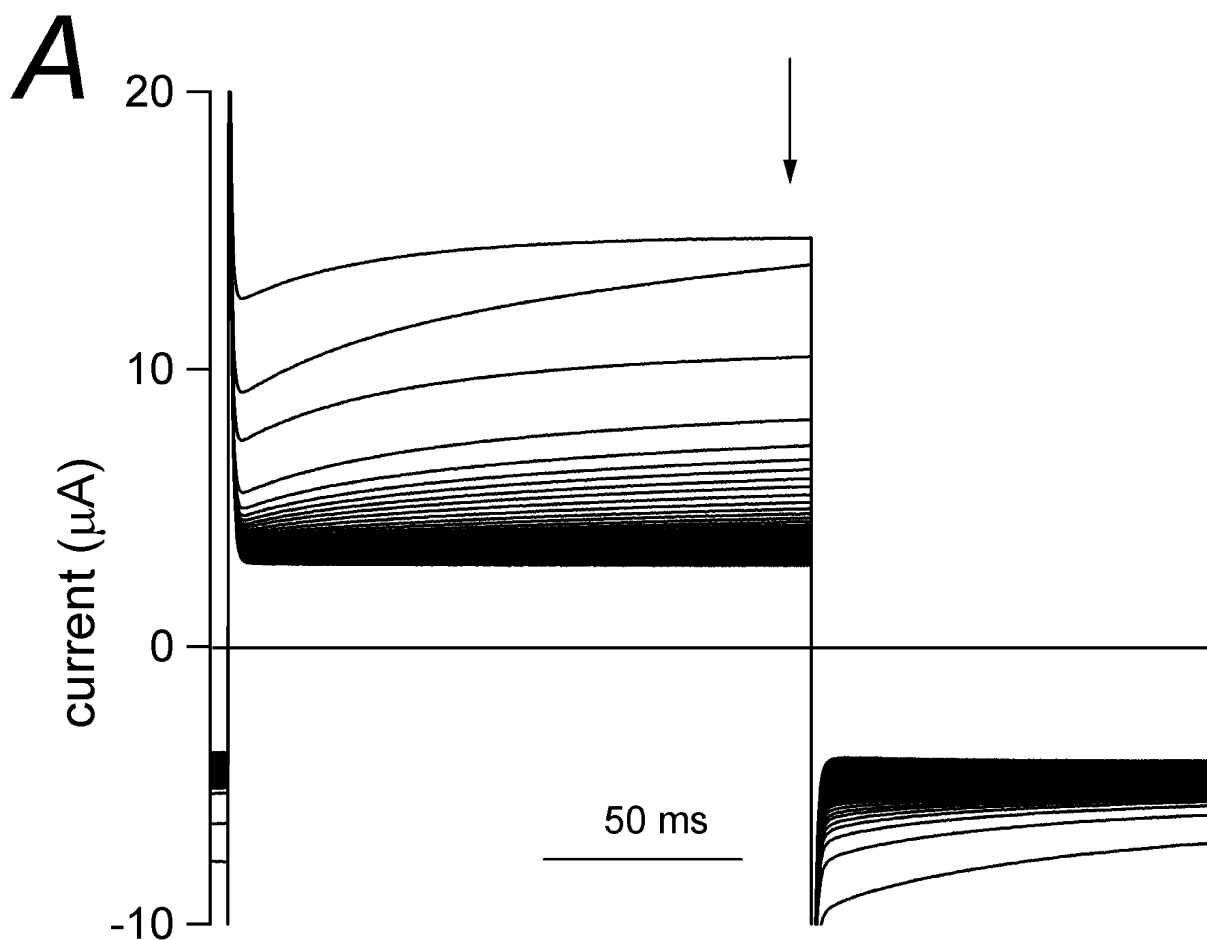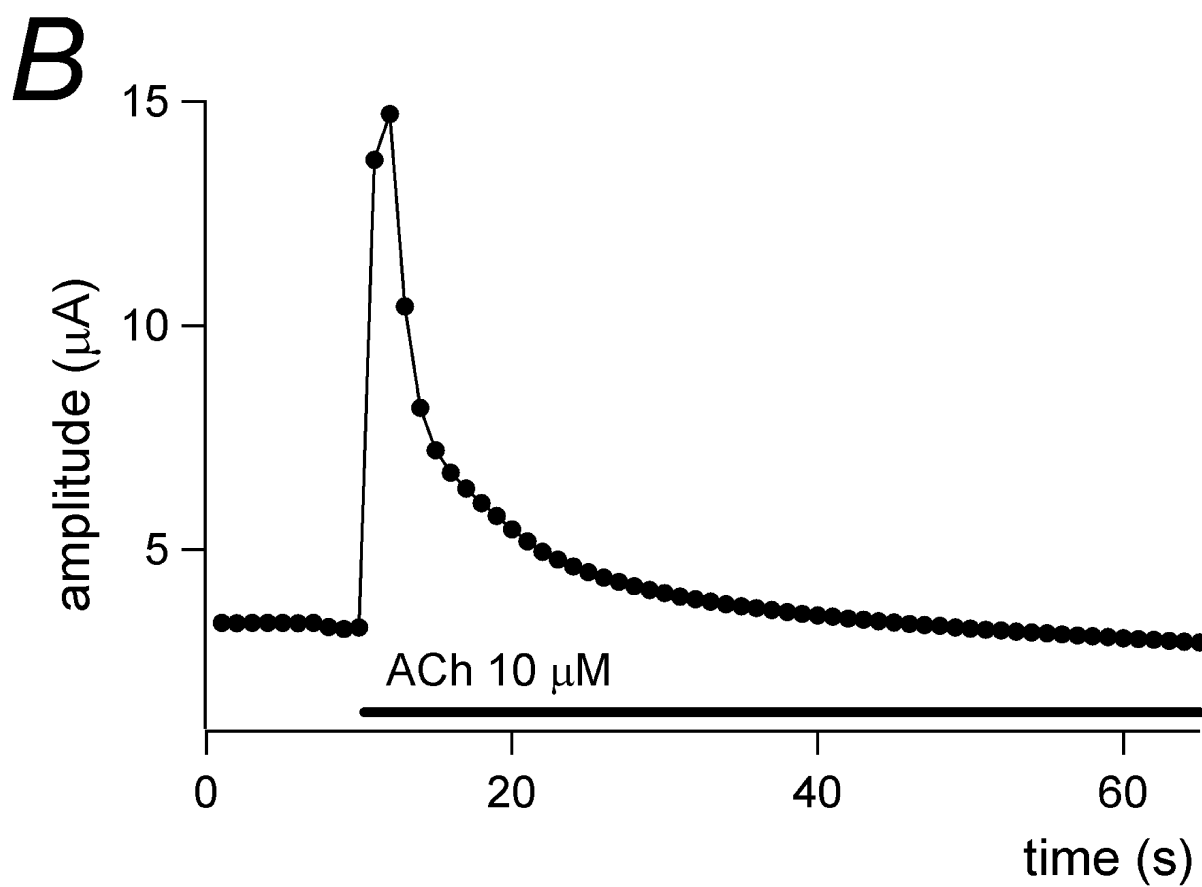

Supplement: jphysiol_2006.115246_2.pdf [file jphysiol_2006.115246_2.pdf]
